# Supplementary material
Source: PubMed Central journal article supplement (PMC7166527)
Supplement: JMV-87-269-s001.pdf [file JMV-87-269-s001.pdf]

| genotype          | Outbreak#      | Outbreak Month | Outbreak Location City | positive | Exposed | Ill | Hospitalized | Fatal | Respiratory Symptoms                                  |
|-------------------|----------------|----------------|------------------------|----------|---------|-----|--------------|-------|-------------------------------------------------------|
| A2a               | ON-OB-2009-20  | Jun-09         | Bradford               | 1        | 282     | 10  | 0            | 0     | URTI, SORETHROAT, COUGH                               |
| A2a               | ON-OB-2010-08  | Jan-10         | King City ON           | 1        | 71      | 12  | 0            | 0     | SORETHROAT, COUGH, OTHER                              |
| A2a               | ON-OB-2010-37  | Jan-10         | Sutton West, Newmarket | 1        | NI      | 7   | 0            | 0     | FEVER, COUGH                                          |
| A2a               | ON-OB-2010-17  | Feb-10         | Toronto                | 1        | 81      | 5   | 0            | 0     | FEVER, SORETHROAT, COUGH                              |
| A2a and A2b1      | ON-OB-2010-43* | Mar-10         | Timmins                | 2        | 0       | 4   | 0            | 0     | COUGH, OTHER                                          |
| A2a               | ON-OB-2011-07  | Feb-11         | Renfrew                | 3        | 270     | 6   | 0            | 0     | COUGH, OTHER                                          |
| A2a and A2b1      | ON-OB-2011-31* | Mar-11         | Woodstock, ON          | 4        | 147     | 6   | 0            | 0     | URTI, SORETHROAT, COUGH, CHILLS                       |
| A2a               | ON-OB-2012-52  | Jan-12         | Halliburton            | 3        | 60      | 5   | 0            | 0     | FEVER, URTI, COUGH                                    |
| A2b1              | ON-OB-2009-13  | Jan-09         | London, ON             | 1        | 0       | 4   | 0            | 0     | URTI, COUGH, OTHER                                    |
| A2b1              | ON-OB-2009-03  | May-09         | Chatham                | 1        | 11      | 2   | 2            | 0     | FEVER, ILI, URTI                                      |
| A2b1              | ON-OB-2010-32  | Mar-10         | London                 | 4        | 0       | 0   | 0            | 0     | SORETHROAT, COUGH                                     |
| A2b1              | ON-OB-2010-27  | Mar-10         | New Market             | 2        | 69      | 9   | 0            | 0     | SORETHROAT, COUGH, OTHER                              |
| A2b1              | ON-OB-2010-42  | Mar-10         | North Bay              | 2        | 530     | 4   | 0            | 0     | ILI, URTI, COUGH, MYALGIA                             |
| A2b1              | ON-OB-2010-34  | Mar-10         | Sault Ste. Marie       | 3        | 374     | 6   | 0            | 0     | FEVER, ILI, URTI                                      |
| A2b1              | ON-OB-2010-39  | Dec-10         | Cambridge              | 4        | 30      | 9   | 0            | 0     | FEVER, URTI, COUGH, MYALGIA                           |
| A2b1              | ON-OB-2011-06  | Jan-11         | Listowel, ON           | 3        | 76      | 2   | 0            | 0     | SORETHROAT, COUGH, OTHER                              |
| A2b1              | ON-OB-2011-44  | Feb-11         | Toronto                | 3        | 42      | 3   | 0            | 0     | FEVER, URTI, COUGH, OTHER                             |
| A2b1              | ON-OB-2011-25  | Feb-11         | Toronto                | 1        | 127     | 8   | 1            | 0     | FEVER, COUGH                                          |
| A2b1              | ON-OB-2011-33  | Feb-11         | Windsor                | 2        | 28      | 3   | 0            | 0     | COUGH, OTHER                                          |
| A2b1              | ON-OB-2011-01  | Mar-11         | Sault Ste. Marie       | 4        | 32      | 2   | 0            | 0     | ILI, URTI                                             |
| A2b1              | ON-OB-2011-46  | Apr-11         | Timmins                | 5        | 0       | 2   | 0            | 0     | SORETHROAT, OTHER                                     |
| A2b1              | ON-OB-2011-30  | May-11         | Hailey Bury Timmins    | 6        | 30      | 16  | 1            | 0     | FEVER, COUGH                                          |
| A2b1*             | ON-OB-2009-11  | May-09         | Bancroft               | 1        | 67      | 8   | 0            | 0     | FEVER, URTI, COUGH                                    |
| A2b1*             | ON-OB-2009-04  | May-09         | Peterborough           | 1        | 254     | 7   | 0            | 0     | LRTI, SORETHROAT, COUGH, MYALGIA                      |
| A2b1*             | ON-OB-2010-05  | Feb-10         | Toronto                | 1        | 47      | 4   | 0            | 0     | ILI, SORETHROAT, COUGH, HEADACHE, MYALGIA             |
| A2b2              | ON-OB-2009-12  | Apr-09         | Owen Sound , ON        | 1        | 28      | 4   | 0            | 0     | FEVER, SORETHROAT, OTHER, COUGH                       |
| A2b2              | ON-OB-2009-16  | Jun-09         | Cornwall               | 1        | 11      | 5   | 0            | 0     | FEVER, COUGH, OTHER                                   |
| A2b2              | ON-OB-2010-21  | Feb-10         | Selby                  | 2        | 66      | 23  | 0            | 0     | COUGH, MYALGIA                                        |
| A2b2              | ON-OB-2010-41  | Mar-10         | Hunstville             | 2        | 212     | 7   | 2            | 0     | FEVER, URTI, SORETHROAT, COUGH                        |
| A2b2              | ON-OB-2011-14  | Mar-11         | Woodstock, ON          | 2        | 163     | 2   | 0            | 0     | FEVER, ILI, SORETHROAT, COUGH, URTI                   |
| A2b2              | ON-OB-2011-47  | Apr-11         | St Catharines          | 6        | 151     | 15  | 0            | 0     | FEVER, URTI, SORETHROAT, COUGH                        |
| A2b2              | ON-OB-2011-48  | Jun-11         | Warkworth, ON          | 7        | 0       | 8   | 0            | 0     | FEVER, ILI, SORETHROAT, COUGH                         |
| A2b2              | ON-OB-2012-50  | Jan-12         | Toronto                | 4        | 0       | 0   | 0            | 0     |                                                       |
| A2b2 <sup>c</sup> | ON-OB-2012-51  | Jan-12         | Hamilton               | 3        | 32      | 3   | 0            | 0     | FEVER, COUGH                                          |
| B1                | ON-OB-2010-38  | Feb-10         | Pickering              | 2        | 37      | 4   | 0            | 0     | FEVER, ILI, URTI, COUGH                               |
| B1                | ON-OB-2011-29  | Mar-11         | Delhi, On              | 5        | 0       | 5   | 0            | 0     | FEVER, COUGH, OTHER                                   |
| B1                | ON-OB-2011-40  | Mar-11         | Nepean                 | 2        | 114     | 16  | 0            | 1     | FEVER, ILI, URTI, SORETHROAT, RESPCGLRT, COUGH, OTHER |
| B1                | ON-OB-2011-45  | Mar-11         | Timmins                | 4        | 0       | 4   | 0            | 0     | FEVER, SORETHROAT, COUGH                              |
| B1                | ON-OB-2011-28  | Apr-11         | Oakville               | 3        | 29      | 3   | 0            | 0     | ILI                                                   |
| B1 and B2         | ON-OB-2012-53* | Feb-12         | Niagara On the Lake    | 3        | 64      | 6   | 0            | 0     | FEVER, ILI, SORETHROAT, COUGH                         |
| B1*               | ON-OB-2010-49  | Mar-10         | Richmond Hill Toronto  | 3        | 12      | 8   | 1            | 0     | FEVER, COUGH, OTHER                                   |
| B2                | ON-OB-2009-19  | Mar-09         | mississauga            | 3        | 45      | 5   | 0            | 0     | FEVER, COUGH                                          |
| B2                | ON-OB-2010-18  | Feb-10         | Oshawa                 | 2        | 154     | 4   | 0            | 0     | FEVER, ILI                                            |
| B2                | ON-OB-2010-26  | Mar-10         | Toronto                | 2        | 25      | 3   | 0            | 0     | FEVER, URTI, COUGH                                    |
| B2                | ON-OB-2011-24  | Feb-11         | Cambridge              | 3        | 80      | 10  | 0            | 0     | FEVER, URTI, COUGH, HEADACHE                          |
| B2                | ON-OB-2011-22  | Feb-11         | Kitchener              | 1        | 5       | 1   | 0            | 0     | FEVER, COUGH                                          |
| B2                | ON-OB-2011-15  | Mar-11         | London                 | 4        | 0       | 0   | 0            | 0     | URTI                                                  |
| B2                | ON-OB-2012-54  | Feb-12         | Burlington             | 3        | 30      | 5   | 0            | 0     | FEVER, COUGH, SORETHROAT, OTHER                       |
| B1 and B2         | ON-OB-2012-55* | Feb-12         | Tavistock, ON          | 4        | 100     | 7   | 0            | 0     | FEVER, ILI, SORETHROAT, COUGH, HEADACHE, MYALGIA      |
| B1                | ON-OB-2011-02  | Apr-11         | London, ON             | 2        | 64      | 5   | 0            | 0     | FEVER, SORETHROAT, COUGH, CHILLS, OTHER               |
| B2                | ON-OB-2009-36  | Jan-09         | Mississauga            | 3        | 45      | 5   |              |       | FEVER, COUGH                                          |

\* these Outbreaks could be genotyped with only one gene

<sup>c</sup> -One Sample from this outbreak was found to have coinfection with Coronavirus

\*. Different genotype strains were present in these outbreaks at the same location

ILI- Influenza like illness

URTI- Upper Respiratory Tract Illness

LRTI-Lower Respiratory tract illness
